# Supplementary material for: Choroidal Abnormalities in Pediatric NF1: A Cohort Natural History Study
Source: MDPI journal article supplement (doi:10.3390/cancers14061423), 2022-03-10
Supplement: s1 [file s1]

**Table S1.** Details of study population genotype and associated CAs parameters (number, area and perimeter). Patients sex, age at baseline and duration of follow-up are also reported.

| Patient | Sex <sup>1</sup> | Age at Baseline (y.o.) | Mutation                                          | Type of Mutation | CAs Number (Sum of Both Eyes) |     | CAs area <sup>2</sup> (Sum of Both Eyes) |      | CAs Perimeter <sup>3</sup> (Sum of Both Eyes) |       | Follow-up Duration |
|---------|------------------|------------------------|---------------------------------------------------|------------------|-------------------------------|-----|------------------------------------------|------|-----------------------------------------------|-------|--------------------|
|         |                  |                        |                                                   |                  | min                           | max | min                                      | max  | min                                           | max   |                    |
| 1       | M                | 3                      | Genetic test not performed                        |                  |                               |     |                                          |      |                                               |       |                    |
| 2       | M                | 7.4                    | NF1 gene microdeletion                            | deletion         | 2                             | 4   | 0.34                                     | 0.42 | 1.16                                          | 1.42  | 3 years            |
| 3       | F                | 7.4                    | NM_000267.3: c.3457_3560del p.(Leu1153Metfs *4)   | frameshift       | 12                            | 24  | 4.82                                     | 6.66 | 14.38                                         | 24.14 | 7 years            |
| 4       | F                | 3.5                    | NM_000267.3: c.7394+2delT                         | splicing         | 1                             | 3   | 0.51                                     | 0.66 | 2.62                                          | 5.15  | 3 years            |
| 5       | M                | 15.5                   | NM_000267.3: c.586+2T>A                           | splicing         | 14                            | 25  | 1.16                                     | 2.23 | 7.95                                          | 12.24 | 7 years            |
| 6       | F                | 4.6                    | NM_000267.3: c.4871T>G p.(Leu1624Arg)             | missense         | 3                             | 13  | 1.84                                     | 2.92 | 6.76                                          | 8.70  | 7 years            |
| 7       | M                | 13.8                   | NM_000267.3: c.3525_3526delAA p.(Arg176Serfs *18) | frameshift       | 15                            | 33  | 3.62                                     | 5.46 | 15.97                                         | 21.93 | 7 years            |
| 8       | M                | 13.4                   | deletion of all the exons of NF1 gene             | deletion         | 9                             | 11  | 2.92                                     | 4.37 | 11.66                                         | 13.46 | 5 years            |
| 9       | M                | 4.3                    | NM_000267.3: c.2088G>A p.(Trp696 *)               | nonsense         | 6                             | 22  | 2.33                                     | 3.09 | 8.46                                          | 14.59 | 5 years            |
| 10      | M                | 6.4                    | Genetic test didn't reveal pathogenic variants    |                  |                               |     |                                          |      |                                               |       |                    |
| 11      | M                | 9.3                    | NM_000267.3: c.662G>A p.(Trp221 *)                | nonsense         | 2                             | 4   | 0.32                                     | 0.69 | 1.62                                          | 2.06  | 7 years            |
| 12      | F                | 3.1                    | NM_000267.3: c.998delA p.(Tyr333Serfs *42)        | frameshift       | 1                             | 1   | 0.44                                     | 0.54 | 2.99                                          | 4.66  | 3 years            |
| 13      | F                | 8.5                    | Genetic test not available                        |                  |                               |     |                                          |      |                                               |       |                    |
| 14      | M                | 4.4                    | NM_000267.3: c.4083delT p.(Arg1362Glufs*23)       | frameshift       | 2                             | 2   | 0.58                                     | 0.67 | 3.19                                          | 4.88  | 3 years            |
| 15      | M                | 4.1                    | NM_000267.3: c.7267dup p.(Thr2423Asnfs*4)         | frameshift       | 1                             | 13  | 0.56                                     | 2.38 | 2.97                                          | 6.88  | 7 years            |
| 16      | F                | 4.5                    | NM_000267.3: c.2531T>C p.(Leu844Pro)              | missense         | 6                             | 18  | 1.55                                     | 2.47 | 6.24                                          | 11.24 | 5 years            |
| 17      | F                | 3.3                    | Genetic test not performed                        |                  |                               |     |                                          |      |                                               |       |                    |

|    |   |      |                                                                 |                |    |    |      |      |       |       |         |
|----|---|------|-----------------------------------------------------------------|----------------|----|----|------|------|-------|-------|---------|
| 18 | F | 5.8  | NM_000267.3: c.1466A>G<br>r.1464_1525del62nt p.(Ser488Argfs *1) | framesh<br>ift | 1  | 2  | 0.54 | 0.92 | 3.08  | 5.83  | 5 years |
| 19 | M | 7.5  | NM_000267.3: c.2851-6_2851-3delCTTT<br>p.(Leu952fs)             | framesh<br>ift | 4  | 11 | 1.23 | 1.53 | 5.14  | 7.04  | 5 years |
| 20 | F | 14.8 | NM_000267.3: c.7619C>A p.(Ser2540 *)                            | nonsens<br>e   | 14 | 16 | 5.80 | 6.66 | 23.02 | 25.21 | 3 years |
| 21 | M | 3.2  | NM_000267.3: c.2617C>G<br>p.(Arg873Gly)                         | missens<br>e   | 1  | 5  | 0.43 | 0.51 | 2.09  | 2.64  | 3 years |
| 22 | M | 7.7  | NM_000267.3: c.889-2A>G                                         | splicing       | 7  | 15 | 2.51 | 2.69 | 10.84 | 14.31 | 3 years |
| 23 | M | 4.1  | NM_000267.3: c.910C>T p.(Arg304 *)                              | nonsens<br>e   | 4  | 17 | 1.81 | 2.24 | 7.03  | 8.19  | 3 years |
| 24 | M | 4.1  | NM_000267.3: c.3911T>G p.(Leu1304 *)                            | nonsens<br>e   | 1  | 3  | 0.55 | 1.64 | 3.41  | 5.54  | 5 years |
| 25 | M | 9.6  | NM_000267.3: c.3301C>T p.(Gln1101 *)                            | nonsens<br>e   | 22 | 42 | 6.04 | 9.48 | 22.53 | 31.26 | 7 years |
| 26 | F | 5    | NM_000267.3: c.6942dupC<br>p.(Ala2315Argfs *4)                  | framesh<br>ift | 1  | 5  | 1.12 | 1.75 | 2.97  | 5.63  | 5 years |
| 27 | M | 6.8  | NM_000267.3: c.2990+1G>A<br>r.2851_2990del140                   | splicing       | 11 | 29 | 2.28 | 3.40 | 10.63 | 20.55 | 5 years |
| 28 | F | 4.4  | NM_000267.3: c.574C>T p.(Arg192 *)                              | nonsens<br>e   | 11 | 29 | 2.94 | 4.61 | 11.08 | 16.31 | 7 years |
| 29 | M | 6.2  | NM_000267.3: c.7125delA<br>p.(Tyr2377Thrfs *20)                 | framesh<br>ift | 6  | 19 | 3.60 | 6.50 | 11.04 | 14.05 | 7 years |
| 30 | F | 4.3  | NM_000267.3: c.7901_7902insTGTTG<br>p.(His2637Leufs *23)        | framesh<br>ift | 3  | 5  | 0.46 | 0.72 | 2.06  | 2.63  | 3 years |
| 31 | M | 10.2 | NM_000267.3: c.7882dupG<br>p.(Val2628Glyfs *11)                 | framesh<br>ift | 15 | 24 | 3.18 | 9.45 | 15.85 | 25.26 | 7 years |
| 32 | M | 5.5  | NM_000267.3: c.1858delA<br>p.(Ser620Valfs *11)                  | framesh<br>ift | 2  | 6  | 0.30 | 1.17 | 1.55  | 3.10  | 3 years |
| 33 | F | 4.1  | NM_000267.3: c.4172G>C<br>p.(Arg1391Thr)                        | missens<br>e   | 13 | 25 | 4.45 | 7.28 | 20.35 | 27.19 | 7 years |
| 34 | F | 3.4  | NM_000267.3: c.2252-2A>G                                        | splicing       | 7  | 18 | 1.32 | 2.41 | 5.92  | 12.77 | 3 years |
| 35 | F | 2.8  | NM_000267.3: c.3163C>T p.(Gln1055 *)                            | nonsens<br>e   | 1  | 4  | 0.39 | 0.58 | 2.11  | 2.26  | 3 years |

|    |   |      |                                                       |            |    |    |      |      |       |       |         |
|----|---|------|-------------------------------------------------------|------------|----|----|------|------|-------|-------|---------|
| 36 | F | 5.9  | Genetic test not available                            |            |    |    |      |      |       |       |         |
| 37 | F | 5.6  | NM_000267.3: c.4267A>G<br>p.(Lys1423Glu)              | missense   | 13 | 28 | 4.89 | 8.21 | 18.49 | 25.93 | 3 years |
| 38 | M | 4.4  | NM_000267.3: c.7331delA<br>p.(Asp2444Valfs *24)       | frameshift | 1  | 1  | 0.26 | 0.77 | 2.11  | 5.68  | 5 years |
| 39 | F | 13.9 | NM_000267.3: c.6709C>T p.(Arg2237 *)                  | nonsense   | 6  | 11 | 0.71 | 2.76 | 4.55  | 8.84  | 7 years |
| 40 | M | 4.5  | NM_000267.3: c.2530C>T<br>p.(Leu844Phe)               | missense   | 4  | 16 | 1.47 | 2.22 | 7.45  | 11.82 | 7 years |
| 41 | M | 11.3 | NM_000267.3: c.6709C>T p.(Arg2237*)                   | nonsense   | 4  | 10 | 2.44 | 2.68 | 9.19  | 10.99 | 3 years |
| 42 | M | 6.2  | NF1 gene microdeletion                                | deletion   | 1  | 3  | 0.61 | 1.13 | 3.63  | 8.42  | 7 years |
| 43 | M | 5.7  | NM_000267.3: c.6724C>T p.(Gln2242*)                   | nonsense   | 2  | 11 | 2.28 | 2.89 | 2.53  | 3.40  | 5 years |
| 44 | M | 9.4  | NM_000267.3: c.3457_3460delCTCA<br>p.(Leu1153Metfs*4) | frameshift | 4  | 6  | 1.13 | 1.24 | 4.66  | 4.98  | 3 years |
| 45 | F | 8.7  | NM_000267.3: c.4108C>T p.(Gln1370*)                   | nonsense   | 17 | 21 | 3.94 | 5.16 | 16.78 | 26.17 | 3 years |
| 46 | M | 6.4  | NM_000267.3: c.1458_1459delAA<br>p.(Arg487Lysfs *3)   | frameshift | 12 | 28 | 3.03 | 4.12 | 11.39 | 14.42 | 5 years |
| 47 | F | 13.6 | NM_000267.3: c.3916C>T p.(Arg1306 *)                  | nonsense   | 19 | 31 | 2.21 | 3.12 | 14.15 | 18.17 | 5 years |
| 48 | M | 3.7  | NM_000267.3:c.1756_1759delACTA<br>p.(Thr586Valfs *18) | frameshift | 2  | 12 | 0.60 | 1.20 | 2.40  | 3.82  | 5 years |
| 49 | M | 15.8 | NM_000267.3: c.3327A>T<br>p.(Leu1109Phe)              | missense   | 14 | 14 | 3.09 | 4.56 | 10.44 | 12.62 | 3 years |
| 50 | M | 15.4 | NM_000267.3: c.1885G>A<br>p.(Gln629Arg)               | missense   | 19 | 20 | 7.02 | 9.76 | 26.49 | 37.43 | 5 years |
| 51 | F | 6.2  | NM_000267.3: c.5205+1G>C                              | splicing   | 1  | 11 | 0.41 | 0.65 | 1.81  | 3.41  | 7 years |
| 52 | M | 4    | NM_000267.3: c.7806+1G>T<br>r.7676_7806de1131         | splicing   | 3  | 5  | 0.47 | 0.96 | 2.53  | 3.66  | 7 years |
| 53 | F | 8.2  | NM_000267.3: c.6709C>T p.(Arg2237 *)                  | nonsense   | 15 | 21 | 5.39 | 7.47 | 21.17 | 28.69 | 3 years |

<sup>1</sup> M= male; F= female. <sup>2</sup> CAs areas are expressed in ODA. <sup>3</sup> CAs perimeters are expressed in ODP.
